# Supplementary material for: Point-of-care testing of methotrexate using a controlled release sensor based on a personal glucose meter
Source: Royal Society of Chemistry journal article supplement (doi:10.1039/d4ay02038c), 2025-01-01
Supplement: d4ay02038c1.pdf [file d4ay02038c1.pdf]

## Supporting Information (SI)

### Point-of-care testing of methotrexate by a controlled-release sensor based on the personal glucose meter

Liyu Yang,<sup>a,b</sup> Siyi Yang,<sup>a,b</sup> Ting Zhang,<sup>a,b</sup> Langyi Zhao,<sup>a,b</sup> Huanbao Fa,<sup>c</sup> Yongzhong Wang,<sup>a,b</sup>  
Danqun Huo,<sup>a,b</sup> Changjun Hou,<sup>a,b,\*</sup> Mei Yang,<sup>a,b,\*</sup>

<sup>a</sup> Key Laboratory of Biorheological Science and Technology, Ministry of Education, College  
of Bioengineering, Chongqing University, Chongqing 400044, PR China

<sup>b</sup> College of Bioengineering, Chongqing University, Chongqing 400044, PR China

<sup>c</sup> College of Chemistry and Chemical Engineering, Chongqing University, Chongqing 400044,  
PR China

\* Corresponding authors.

E-mail addresses: houcj@cqu.edu.cn (C.J. Hou); yangmei@cqu.edu.cn (M. Yang).

Tel: +86 23 6511 2673; Fax: +86 23 6510 2507

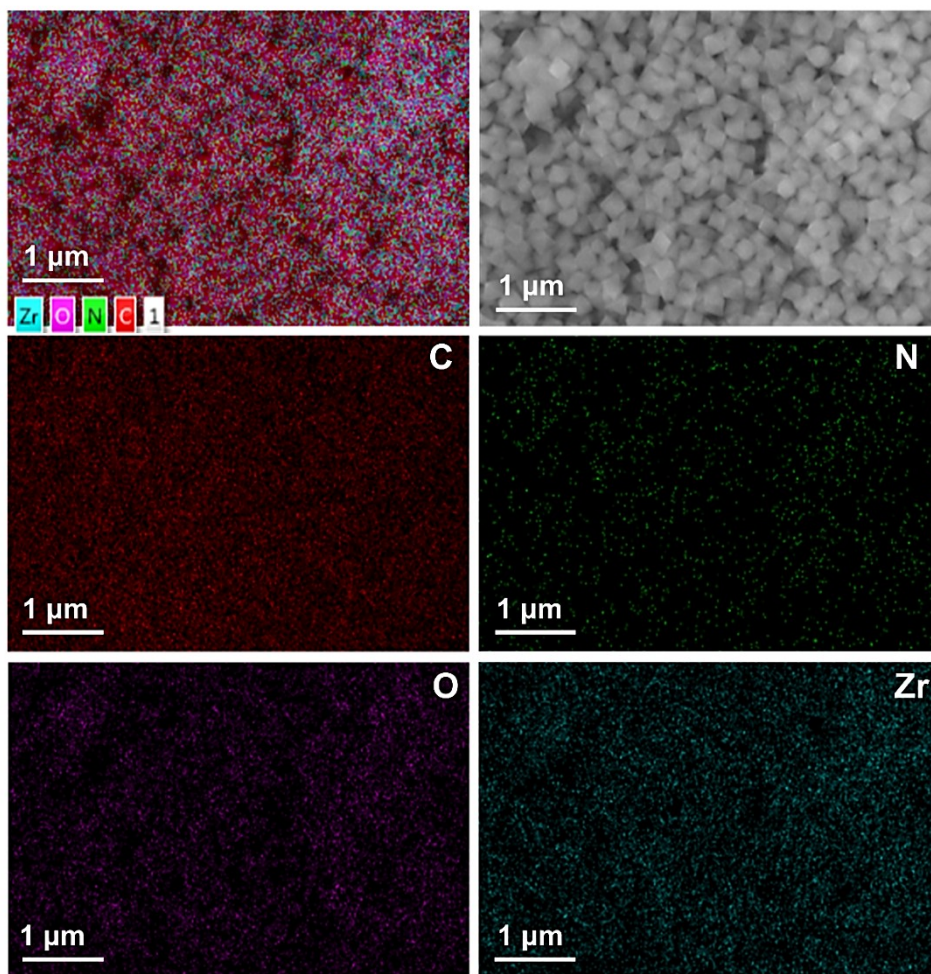

**Fig. S1** EDS energy spectrum of UiO-66-NH<sub>2</sub>

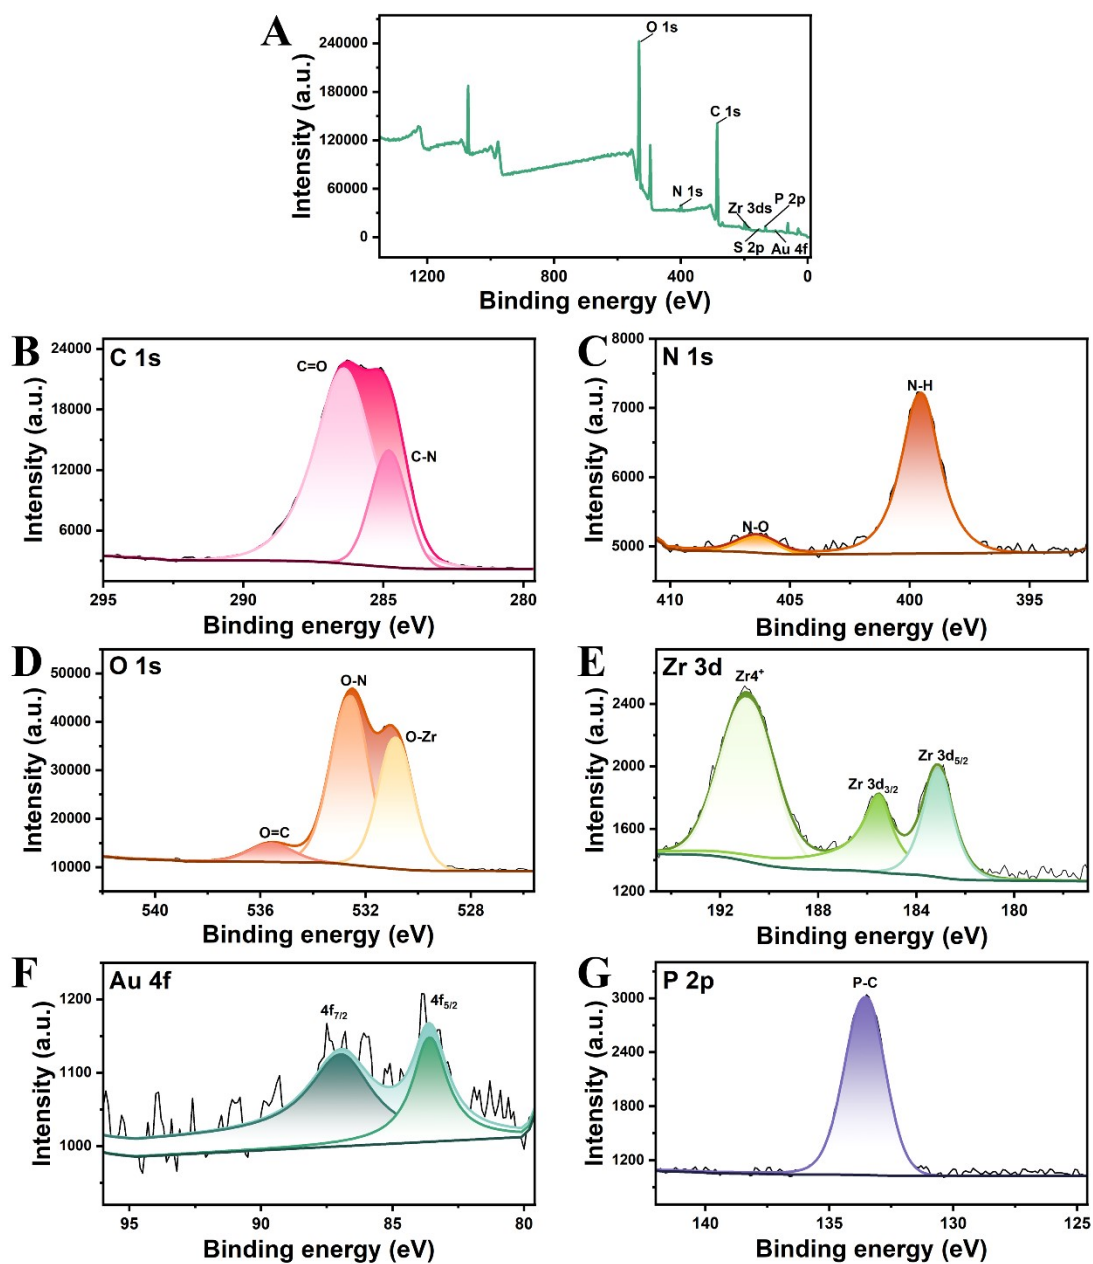

**Fig. S2** XPS total spectrum of Apt@AuNPs@HP-UiO-66-NH<sub>2</sub> (A); XPS energy spectra of AuNPs@Apt@HP-UiO-66-NH<sub>2</sub>: C 1s (B); N 1s (C); O 1s (D); Zr 3d (E); Au 4f (F); P 2p (G)

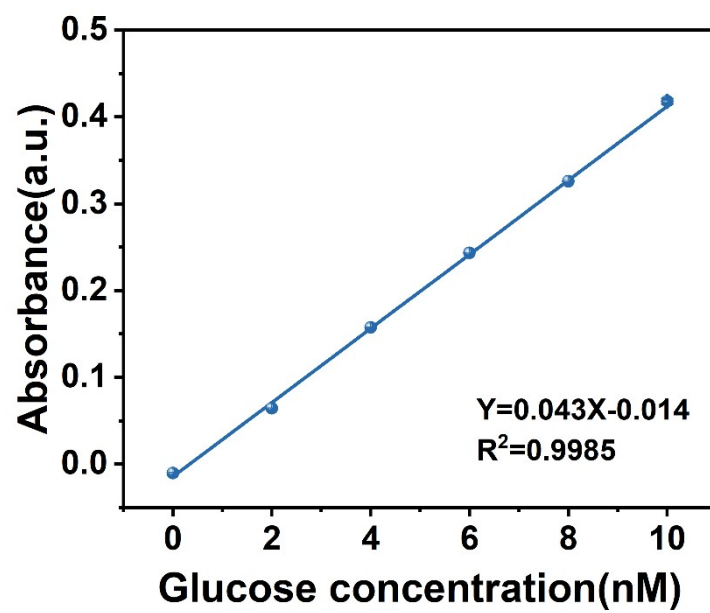

Fig. S3 Standard curve for the detection of glucose concentration by DNS method

**Table S1** Comparison of methods for glucometer-based detection of non-glucose targets

| Carrier                   | Gated                                                    | Target                                        | Detection range (nM) | LOD (nM) | Ref.      |
|---------------------------|----------------------------------------------------------|-----------------------------------------------|----------------------|----------|-----------|
| MSN                       | AuNPs-Ab                                                 | CYFRA21-1                                     | 39 - 4800            | 23.7     | 1         |
|                           | MnO <sub>2</sub> nanosheets                              | glutathione                                   | 100 - 10000          | 34       | 2         |
| Liposomes                 | -SH recognition,<br>surfactant lysis of<br>liposomes     | patulin                                       | 0.0154 - 7.706       | 0.0077   | 3         |
|                           | Aptamer recognition,<br>surfactant lysis of<br>liposomes | Aggregation of $\beta$ -<br>amyloid oligomers | 5.0 - 1000           | 2.27     | 4         |
| Nanotube array            | AuNPs and Aptamer                                        | cocaine                                       | 10 - 600             | 5.2      | 5         |
| HP-UiO-66-NH <sub>2</sub> | AuNPs@Apt                                                | MTX                                           | 100 - 20000          | 100      | This work |

**Table S2** Comparison of different methods for MTX detection

| Methods         | Systems                                   | LOD ( $\mu\text{M}$ ) | Detection range ( $\mu\text{M}$ ) | Ref.      |
|-----------------|-------------------------------------------|-----------------------|-----------------------------------|-----------|
| Immunoassay     | MoS <sub>2</sub> quantum dots             | 0.042                 | 0.05–1                            | 6         |
| Fluorescence    | FAM or Cy5                                | 0.03                  | 0.1–2                             | 7         |
| SERS            | gold-coated nanopillar<br>SERS substrates | 0.13                  | 0.43–2                            | 8         |
| Electrochemical | AB/MWCNT/STAC-<br>paste electrode         | $1.81 \times 10^{-3}$ | 0.02–8                            | 9         |
| Colorimetric    | Aptamer/G-<br>quadruplex/hemin            | $5.66 \times 10^{-3}$ | 0.01-1                            | 10        |
| PGM             | Controlled release sensor                 | 0.1                   | 0.1-20                            | This work |

## References

1. F. Lv, M. Wang, H. Ma, L. Hu, Q. Wei and D. Wu, *Sensors and Actuators B: Chemical*, 2022, **371**, 132543.
2. Q. Q. Tan, R. R. Zhang, R. M. Kong, W. S. Kong, W. Z. Zhao and F. L. Qu, *Microchimica Acta*, 2018, **185**, 44.
3. D. Nie, Z. Zhang, D. Guo, Y. Tang, X. Hu, Q. Huang, Z. Zhao and Z. Han, *Biosensors and Bioelectronics*, 2021, **175**, 112884.
4. Y. Hu, X. Zhou, L. Wang, J. Gu, Y. Zuo, L. Zhao, W. Lu and Y. Yu, *Biosensors and Bioelectronics*, 2023, **225**, 115108.
5. G. Z. Li and D. P. Tang, *Journal of Materials Chemistry B*, 2017, **5**, 5573-5579.
6. L. Yang, J. Ge, D. Ma, J. Tang, H. Wang and Z. Li, *Spectrochimica Acta Part A: Molecular and Biomolecular Spectroscopy*, 2022, **279**, 121443.
7. J. He, J. Wang, M. Zhang and G. Shi, *ACS Sensors*, 2021, **6**, 2436-2441.
8. Y. Göksel, E. Dumont, R. Slipets, S. T. Rajendran, S. Sarikaya, L. H. E. Thamdrup, K. Schmiegelow, T. Rindzevicius, K. Zor and A. Boisen, *ACS Sensors*, 2022, **7**, 2358-2369.

9. S. Li, A. R. Niu, C. X. Lan, X. M. Xu, S. K. Sun, C. Xuan, P. Zhao, Q. W. Tian and T. Zhou, *Journal of Applied Electrochemistry*, 2023, **53**, 559-569.
10. S. Li, J. Xiang, F. Yang, R. Yuan and Y. Xiang, *Spectrochimica acta. Part A, Molecular and biomolecular spectroscopy*, 2023, **295**, 122633-122633.
